# Supplementary material for: The Serine Biosynthesis of Paenibacillus polymyxa WLY78 Is Regulated by the T-Box Riboswitch
Source: MDPI journal article supplement (doi:10.3390/ijms22063033), 2021-03-16
Supplement: s1 [file s1]

**Table S1.** Strains and plasmids used in this study

| Strain/plasmid                                    | Relevant characteristics                                                                                                                                      | Source             |
|---------------------------------------------------|---------------------------------------------------------------------------------------------------------------------------------------------------------------|--------------------|
| <i>P. polymyxa</i> strains                        |                                                                                                                                                               |                    |
| WLY78                                             | Wild-type strain                                                                                                                                              |                    |
| $\Delta serA$                                     | In-frame deletion mutant of the <i>serA</i> gene                                                                                                              | This study         |
| Ser T-box <sup><math>\Delta 216</math></sup>      | A mutant of <i>P. polymyxa</i> WLY78 having deletion of a 216 bp in the Ser T-box region                                                                      | This study         |
| Ser T-box <sup><math>\Delta 70</math></sup>       | A mutant of <i>P. polymyxa</i> WLY78 having deletion of a 70 bp in the Ser T-box region                                                                       | This study         |
| SerT-box <sup><math>\Delta 280</math></sup>       | A mutant of <i>P. polymyxa</i> WLY78 with deletion of the full length of the Ser T-box region (from TSS to polyU)                                             | This study         |
| Ser T-box <sup><math>\Delta 70</math>-BamHI</sup> | A mutant of <i>P. polymyxa</i> WLY78 with deletion of the full length of the Ser T-box region (from TSS to polyU) with the polyU being replaced by BamHI site | This study         |
| <i>E. coli</i> strains                            |                                                                                                                                                               |                    |
| JM109                                             | General cloning host; recA1, endA1, gyrA96, thi-1, hsdR17, supE44, relA1, $\Delta$ (lac-proAB)/F' [traD36, proAB+, lacIq, lacZ $\Delta$ M15]                  | Sangon Biotech Co. |
| Plasmids                                          |                                                                                                                                                               |                    |
| pRN5101                                           | Temperature-sensitive <i>E. coli</i> - <i>Bacillus</i> shuttle vector, Em <sup>r</sup>                                                                        |                    |
| pHY300PLK                                         | Multiple-copy <i>E. coli</i> - <i>Bacillus</i> shuttle vector, Tc <sup>r</sup>                                                                                | Takara             |
| pPR9TT                                            | Broad-host range <i>lacZ</i> promoter probe vector; RK2 replicon; Amp <sup>r</sup> , Cm <sup>r</sup>                                                          | Sangon Biotech Co. |
| pRDserA                                           | A derivative of pRN5101 vector for construction of the <i>serA</i> deletion mutant                                                                            | This study         |
| pRDSer T-box <sup><math>\Delta 216</math></sup>   | A derivative of pRN5101 vector for construction of the Ser T-box <sup><math>\Delta 216</math></sup> mutant                                                    | This study         |
| pRDSer T-box <sup><math>\Delta 70</math></sup>    | A derivative of pRN5101 vector for construction of the Ser T-box <sup><math>\Delta 70</math></sup> mutant                                                     | This study         |
| pRDSer T-box <sup><math>\Delta 280</math></sup>   | A derivative of pRN5101 vector for construction of the Ser T-box <sup><math>\Delta 280</math></sup> mutant                                                    | This study         |
| pRUBamHI                                          | A derivative of pRN5101 vector for construction of the Ser Ser T-box <sup><math>\Delta 70</math>-BamHI</sup> mutant in which polyU was replaced by BamHI      | This study         |
| <i>lacZ</i> fusion                                |                                                                                                                                                               |                    |
| pSerA-lacZ                                        | A derivative of pHY300PLK vector carrying promoter and leader region of the <i>serA</i> fused to the <i>lacZ</i> coding region from pPR9TT vector             | This study         |
| pSI-lacZ                                          | A derivative of pHY300PLK vector carrying the mutated leader region (AGC being mutated to AGA) fused to the <i>lacZ</i> coding region from pPR9TT vector      | This study         |
| pSII-lacZ                                         | A derivative of pHY300PLK vector carrying the mutated leader region (TCC being mutated to ACC) fused to the <i>lacZ</i> coding region                         | This study         |
| pSIII-lacZ                                        | A derivative of pHY300PLK vector carrying the mutated leader region (AGT being mutated to AGA) fused to the <i>lacZ</i> coding region                         | This study         |

**Table S2.** Primers used in this study

| Primer Name | Sequence (5'→3')                                  | PCR product                                                  |
|-------------|---------------------------------------------------|--------------------------------------------------------------|
| SerTBupF    | acgatgcgtccggcgtagagTCATCAATGGCTTCAACAAG          | Upstream region of Tbox <sup><math>\Delta 216</math></sup>   |
| SerTBupR    | aacaatgatgGATAACTCTCGTCCCTTAC                     |                                                              |
| SerTBdnF    | gagagttatcCATCATTTGTTGTTCGC                       | Downstream region of Tbox <sup><math>\Delta 216</math></sup> |
| SerTBdnR    | cgcaaaagacataatcgataCTCAAAAAATTTAAAAACCACTTG      |                                                              |
| SerTB70upR  | aactactttcGTTATCCTTTCCGGTCATTTTATG                | Upstream region of Tbox <sup><math>\Delta 70</math></sup>    |
| SerTB70dnF  | aaaggataacGAAAGTAGTTACTTCGTAC                     | Downstream region of Tbox <sup><math>\Delta 70</math></sup>  |
| serAupF     | acgatgcgtccggcgtagagatccAAGCTAGAGAAGATGCGG        | Upstream region of <i>serA</i>                               |
| serAupR     | aacacaacgcCATTCCTGCTCATCTCG                       |                                                              |
| serAdnF     | gcaggaaatgGCGTTGTGTTGCTGCTTC                      | Downstream region of <i>serA</i>                             |
| serAdnR     | cgcaaaagacataatcgataAAAATATCCAGATTGAGCCAATCA<br>G |                                                              |
| SerTB280upR | aacaatgatgGATGCCCGAAAACCGCAAAG                    | Upstream region of Tbox <sup><math>\Delta 280</math></sup>   |

|                            |                                         |                                                     |
|----------------------------|-----------------------------------------|-----------------------------------------------------|
| SerTB280dnF                | ttcgggcataCATCATTGTTGTTGTCGC            | Downstream region of Tbox <sup>Δ280</sup>           |
| SerTBbamHIupR              | GGGGGTGGATCCGATGCCCCGAAAACCGCAAA        | Upstream region of Ser T-box <sup>Δ70-BamHI</sup>   |
| SerTBbamHI <sub>dn</sub> F | GGCATCGGATCCACCCCCGAATCACATACTA         | Downstream region of Ser T-box <sup>Δ70-BamHI</sup> |
| <b><i>lacZ</i> fusion</b>  |                                         |                                                     |
| Ser T-boxp-f               | tagagatctgcaggctgcagAGTTAGTTAGTCCTCTGC  | Ser T-box promoter cloning                          |
| Ser T-boxp-r               | gtaaaacgacCATGTTACTTCGTCACCG            |                                                     |
| lacZ-f                     | atgGTCGTTTTACAACGTCGTG                  | <i>lacZ</i> cloning                                 |
| lacZ-r                     | ttataacaggaattcccgggTTATTTTGGACACCAGACC |                                                     |
| MutC87A-f                  | TAACTACTTTCAGAGCTCC                     | AGA mutation                                        |
| MutC87A-r                  | AGTAGTTACTTCGTCACC                      |                                                     |
| MutT90A-f                  | AACTACTTTCAGCGC <u>A</u> CTTG           | TCC mutation                                        |
| MutT90A-r                  | AGTAGTTACTTCGTCACCGG                    |                                                     |
| MutT97A-f                  | AGCGCTCCTGAG <u>A</u> TATTG             | AGT mutation                                        |
| MutT97A-r                  | GGAGCGCTGAAAGTAGTT                      |                                                     |
| <b>For RT-PCR</b>          |                                         |                                                     |
| RTserA-r                   | TACCTGCCGTCATGATGC                      | T-box verification                                  |
| RTser Tbox-f               | GAGAAAAGGTATTGATTTTCGTCC                |                                                     |
| RTser Tbox-r               | CACATACTATCTCCATAGT                     |                                                     |
| <b>For qRT-PCR</b>         |                                         |                                                     |
| q16s-f                     | TTTGTCGTCAGCCTCGTGTTCGTG                | 16S rDNA                                            |
| q16s-r                     | ATCCCCACCTTCCTCCGGTTTG                  |                                                     |
| qserA-f                    | GCTGGCAGGCTATGGCGAAC                    | <i>serA</i>                                         |
| qserA-r                    | GGTGCCGACACGACCGATAATG                  |                                                     |
| qnifH-f                    | AACAGCCGGAATACGGACC                     | <i>nifH</i>                                         |
| qnifH-r                    | ACCTGCCAGCTCTTCATACTC                   |                                                     |
